# Supplementary material
Source: publisher figshare collection journal article supplement (https://diabetesjournals.figshare.com/ndownloader/files/35504621)

**Animation 2. Functional data analysis showing the differences in mean temporal glucose levels across the 24-hr day and its evolution across gestation in women with type 1 diabetes who gave birth to an LGA (>90th centile on GROW) infant (represented by the dark wavy line) compared with those who did not (represented by the horizontal zero dotted line) with 95% pointwise Confidence Interval (gray section). The time period where the 95% Confidence Interval sit on the same side of 0.0, indicates a significant difference in glucose.**


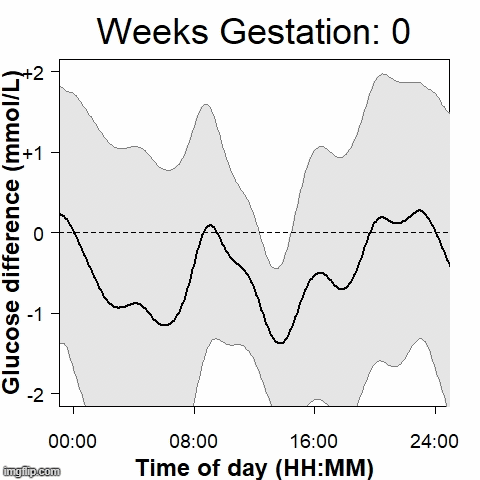

Supplement: Supplementary file 1 [file 35504621]
